# Supplementary material for: Environmental and taxonomic controls of carbon and oxygen stable isotope composition in Sphagnum across broad climatic and geographic ranges
Source: Copernicus journal article supplement (doi:10.5194/bg-2018-120), 2018-03-28
Supplement: Supplementary file 1 [file bg-2018-120-supplement.pdf]

SUPPLEMENTAL MATERIAL

Granath et al.

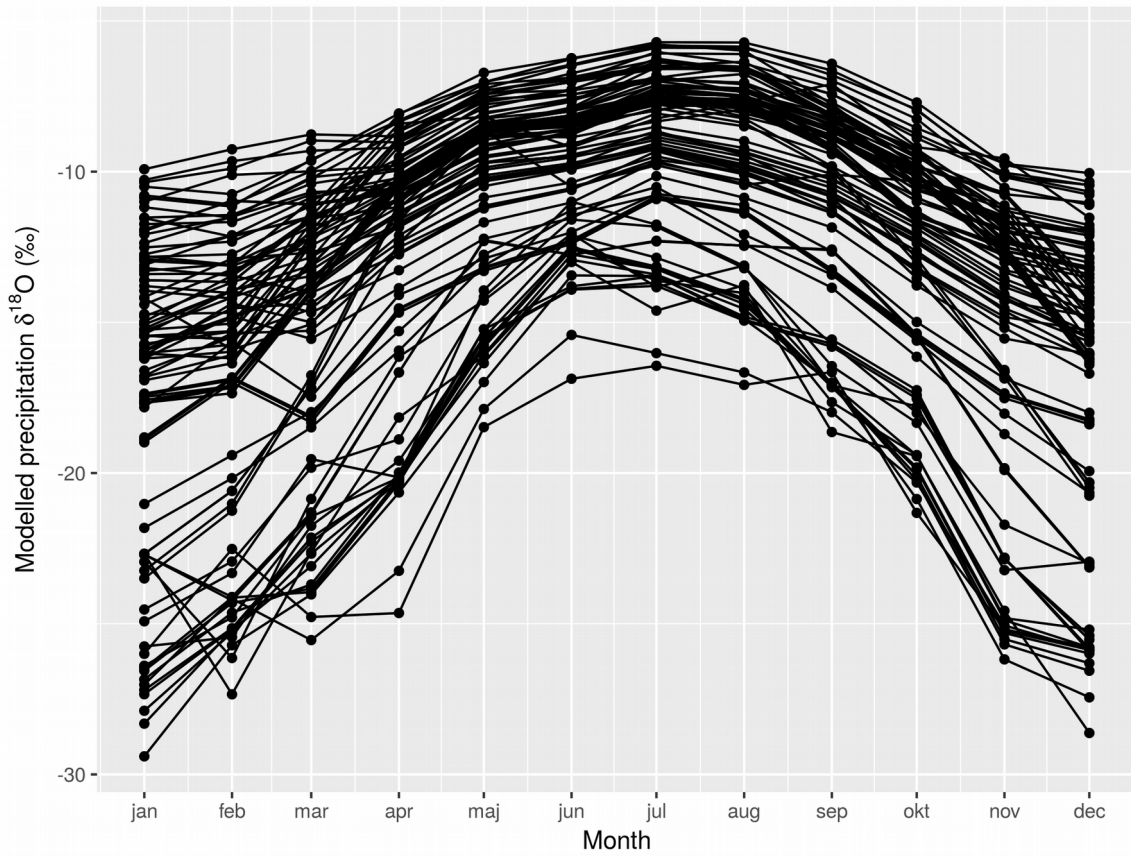

Figure S1. Annual variation in modelled  $\delta^{18}\text{O}_{\text{precip}}$  at the sample sites (one line per site).

Table S1. List of sampled sites, their location and sampling year.

| <b>Region</b>                       | <b>Site</b>             | <b>Latitude<br/>(wgs84)</b> | <b>Longitude<br/>(wgs84)</b> | <b>Elevation<br/>(m asl)</b> | <b>Year</b> |
|-------------------------------------|-------------------------|-----------------------------|------------------------------|------------------------------|-------------|
| Bulgaria, Central Rhodopes Mts      | Chairski lakes          | 41.590646                   | 24.446419                    | 1377                         | 2013        |
| Bulgaria, Vitosha Mts               | Kapaklivets             | 42.593977                   | 23.280245                    | 1829                         | 2013        |
| Bulgaria, Western Rodopi Mts        | Shiroka Polyana         | 41.756378                   | 24.144839                    | 1544                         | 2013        |
| Bulgaria, Western Stara planina Mts | Petrohan pass           | 43.117778                   | 23.1225                      | 1376                         | 2013        |
| Canada, AB                          | 208UB                   | 56.1157                     | -115.7024                    | 660                          | 2013        |
| Canada, AB                          | BC35                    | 55.87                       | -115.1                       | 653                          | 2013        |
| Canada, AB                          | Wandering River_Control | 55.353942                   | -112.517692                  | 566                          | 2014        |
| Canada, NT (S)                      | Scotty Creek            | 61.308833                   | -121.305166                  | 282                          | 2013        |
| Canada, ON (E)                      | Mer Bleue               | 45.40944166                 | -75.518708                   | 68                           | 2013        |
| Canada, ON (N)                      | MOE BOG                 | 52.693756                   | -83.945183                   | 125.5                        | 2014        |
| Canada, ON (N)                      | MOE MOSS                | 52.696969                   | -83.950642                   | 88                           | 2014        |
| Canada, ON (NW)                     | Raith                   | 48.85354                    | -89.95639                    | 472                          | 2013        |
| Canada, ON (NW)                     | Savanne                 | 48.954                      | -90.23306                    | 458                          | 2013        |
| Canada, ON (S)                      | Parry_Sound             | 45.4597765                  | -80.15097025                 | 222.75                       | 2013        |
| Canada, ON (S)                      | Puslinch_bog            | 43.40805675                 | -80.26402575                 | 307                          | 2013        |
| Canada, QC                          | Coteau road             | 47.7668                     | -64.5940825                  | 4.5                          | 2013        |
| Canada, QC                          | Goulet                  | 47.71879                    | -64.684885                   | 2.5                          | 2013        |
| Canada, QC                          | Grande-Plee Bleue       | 46.7798775                  | -71.0570275                  | 92.5                         | 2013        |
| Canada, QC                          | Jifi (Haut-Shippagan)   | 47.7399825                  | -64.7446675                  | 2                            | 2013        |
| Canada, QC                          | Miscou #5               | 48.0095125                  | -64.5060325                  | 5                            | 2013        |
| Canada, QC                          | Saint-Charles           | 46.7882475                  | -70.9727375                  | 99                           | 2013        |
| Canada, QC                          | Sainte-Catherine        | 46.8725                     | -71.585795                   | 169.5                        | 2013        |
| Canada, QC                          | Saint-Etienne           | 46.6534425                  | -71.31894                    | 98                           | 2013        |
| Canada, QC                          | Wilson                  | 47.939865                   | -64.52368                    | 4                            | 2013        |
| Canada, QC                          | Chute Panet             | 46.8693675                  | -71.8403475                  | 153.5                        | 2013        |
| China                               | Hani                    | 42.22584028                 | 126.5189861                  | 851.25                       | 2014        |
| China                               | Mangui                  | 52.28330556                 | 122.4387153                  | 741.75                       | 2014        |
| Czech Republic                      | Jizerka                 | 50.82724306                 | 15.32870833                  | 864.25                       | 2013        |
| Czech Republic                      | Mrtvý luh               | 48.87025                    | 13.87161111                  | 739.75                       | 2013        |
| Czech Republic                      | Velký Močálbog          | 50.39621528                 | 12.63510417                  | 925.75                       | 2013        |
| Estonia (central)                   | Männikjärve bog         | 58.87583333                 | 26.24722222                  | 81                           | 2013        |
| Estonia (central)                   | Parika bog              | 58.475                      | 25.77041667                  | 52                           | 2013        |
| Estonia (NE)                        | Seli bog                | 59.17055556                 | 27.27388889                  | 58                           | 2013        |
| Estonia (SW)                        | Tolkuse bog             | 58.13888889                 | 24.51972222                  | 10                           | 2013        |
| Finland (N)                         | Kaamanen                | 69.140792                   | 27.2712                      | 165                          | 2013        |
| Finland (N)                         | Salmisuo                | 62.78477                    | 30.947475                    | 116                          | 2013        |
| Finland (N)                         | Siikajoki               | 64.731505                   | 24.719083                    | 46.75                        | 2013        |
| Finland (N)                         | Siikaneva               | 61.83722                    | 24.169767                    | 131.5                        | 2013        |
| Finland (S)                         | Tervalaminsuo           | 60.3874                     | 23.5844175                   | 78                           | 2013        |

|                                    |                                      |             |             |        |                |
|------------------------------------|--------------------------------------|-------------|-------------|--------|----------------|
| Italy (N)                          | Lupicino                             | 46.42944444 | 11.41222222 | 1288   | 2013           |
| Japan (NE)                         | East Ochiishi Mire                   | 43.20111    | 145.51981   | 176.75 | 2013           |
| Netherlands                        | Bargerveen                           | 52.68564    | 7.024459    | 18     | 2014           |
| Norway (central)                   | Bjornmyra                            | 63.33613    | 10.4056925  | 135.25 | 2013           |
| Norway (central)                   | Hemne                                | 63.2146975  | 9.0210675   | 60     | 2013           |
| Norway (central)                   | Tydal                                | 63.066745   | 11.3981125  | 482.25 | 2013           |
| Poland (N)                         | Linkowo                              | 52.9544943  | 15.9308732  | 46     | 2013           |
| Poland (N)                         | Tuchola (BT)                         | 53.8296014  | 17.5632897  | 127    | 2013           |
| Poland (SE)                        | Puścizna Wielka bog                  | 49.4529375  | 19.75760417 | 650.75 | 2013           |
| Poland (SE)                        | Tarnawa Niżna                        | 49.11193056 | 22.82725    | 670.5  | 2013           |
| Poland (SE)                        | Zakole bog                           | 49.21551389 | 22.7415625  | 564    | 2014           |
| Romania, Apuseni Mts               | Molhaşul Mare de la Izbuç            | 46.58972222 | 22.76111111 | 1208   | 2013           |
| Romania, Ciomatu Mts               | Tinovul Mohoş bog                    | 46.13638889 | 25.90277778 | 1048   | 2013           |
| Romania, Gutâi Mts                 | Tăul lui Dumitru bog                 | 47.82472222 | 23.69833333 | 1142   | 2014           |
| Romania, Maramureş Mts             | Tăul Obcioarei bog                   | 47.68486111 | 24.53666667 | 1043   | 2013           |
| Romania, Obcina Mestecanisului Mts | Găina-Lucina                         | 47.65944444 | 25.18222222 | 1212   | 2013           |
| Russia, Komi Republic              | Kuzobnjur                            | 61.838269   | 53.297717   | 117    | 2013           |
| Russia, Komi Republic              | Ust-pozheg                           | 61.94259    | 50.273818   | 86     | 2013           |
| Russia, Middle of West Siberia     | Kondinskies Lakes                    | 60.85347    | 63.520245   | 69.5   | 2013           |
| Russia, Middle of West Siberia     | Mukhrino                             | 60.89942    | 68.68825333 | 34     | 2013 &<br>2014 |
| Russia, Middle of West Siberia     | Kogalym                              | 62.230191   | 74.13096    | 75     | 2013           |
| Russia, Middle of West Siberia     | Nizneartovsk                         | 60.916      | 76.8116     | 44     | 2013           |
| Russia, Middle of West Siberia     | Pogranichnoe                         | 62.9707     | 75.18102    | 103    | 2013           |
| Russia, North of West Siberia      | Gupkinskoe                           | 64.55025    | 76.95076    | 40     | 2013           |
| Russia, North of West Siberia      | Hanimey                              | 63.78       | 75.55       | 66     | 2014           |
| Russia, North of West Siberia      | Pangody                              | 65.87059    | 74.95099    | 62     | 2013           |
| Russia, North of West Siberia      | Tetu-Mamontotay                      | 63.221      | 75.7112     | 118    | 2013           |
| Russia, South of West Siberia      | Nikolaevka                           | 55.1316     | 79.0316     | 119    | 2013           |
| Russia, South of West Siberia      | Plotnikovo                           | 56.85009    | 82.8311     | 118    | 2013           |
| Russia, St-Petersburg region       | Bolshoe                              | 60.0642     | 30.65478    | 33     | 2013           |
| Russia, St-Petersburg region       | Nizhne-Svirsky State Natural Reserve | 60.6667     | 33.0378     | 6      | 2013           |
| Russia, St-Petersburg region       | Ozernoe                              | 60.3518     | 29.55455    | 55     | 2013           |
| Russia, St-Petersburg region       | Stroganovo                           | 59.28565    | 30.00917    | 113    | 2013           |
| Sweden (N)                         | Abisko mire                          | 68.35916    | 18.81038    | 356    | 2013           |
| Sweden (N)                         | Stordalen                            | 68.3528     | 19.03689    | 378    | 2013           |
| Sweden (N)                         | Storflaket                           | 68.34711    | 18.97589    | 387    | 2013           |

|                             |                          |           |             |      |      |
|-----------------------------|--------------------------|-----------|-------------|------|------|
| Sweden (S)                  | Kulflyten                | 59.90254  | 15.83353    | 137  | 2013 |
| Sweden (S)                  | Store mosse              | 57.29919  | 13.94138    | 163  | 2013 |
| Sweden (S)                  | Traneröds mosse          | 56.04455  | 13.18672    | 168  | 2013 |
| Switzerland, Jura           | Etang de la Gruere       | 47.239622 | 7.049483    | 1003 | 2014 |
| Switzerland, Jura           | Le Cachot                | 47.005658 | 6.665169    | 1052 | 2014 |
| UK, England                 | Fenns and Whixall Mosses | 52.915    | -2.773      | 90   | 2013 |
| UK, Scotland                | Flanders Moss            | 56.151    | -4.207      | 19   | 2013 |
| UK, Scotland                | Forsinard Flows          | 58.382    | -3.828      | 182  | 2013 |
| UK, Scotland                | Moidach More             | 57.453    | -3.629      | 274  | 2013 |
| UK, Wales                   | Cors Fochno              | 52.502    | -4.011      | 4    | 2013 |
| USA, Interior Alaska, Healy | CiPEHR                   | 63.88202  | -149.2269   | 671  | 2014 |
| USA, Maine                  | Great Waas Island        | 44.472147 | -67.582071  | 15   | 2013 |
| USA, Maine                  | Orono Bog                | 44.869721 | -68.727243  | 42   | 2013 |
| USA, Maine                  | Saco Heath               | 43.545971 | -70.47155   | 43   | 2013 |
| USA, New York               | Bloomindale Bog          | 44.383778 | -74.140796  | 474  | 2013 |
| USA, New York               | Greenwoods Conservancy   | 42.71707  | -75.0990505 | 545  | 2013 |
| USA, New York               | Lake Desolation          | 43.162063 | -73.977556  | 514  | 2013 |
| USA, New York               | Silver Lake              | 44.511166 | -73.885986  | 449  | 2013 |
